# Supplementary material for: RETRACTED ARTICLE: Entrée or Sampler? A Randomized Controlled Trial of Two Approaches to Single Session Internet-Based Interventions
Source: Springer Nature journal article supplement (doi:10.1007/s10608-023-10459-5), 2024-01-25
Supplement: MOESM1 [file 26664352]

**Supplement**

**Part 1. Treatment Allocation**

The first author created the randomization sequence that automatically assigned participants to a condition. The first author also enrolled participants. Treatment allocation was initially determined as follows: 201 participants for the entrée condition (67 participants for each of the three variations), 200 participants for the sampler condition, and 100 participants in the control condition. Randomization was initially configured in Qualtrics to assign people to a condition with odds of 201:501 for the entrée condition, 200:500 for the sampler condition, and 100:500 for the control condition. After data collection began before conducting any analyses, we decided to increase the target sample size to 501 who completed Time 1. We continued to assign participants with the same odds of condition assignment until our target sample was reached.

**Part 2. Descriptive Statistics for Outcome Variables.**

Time 1 Time 2

*M SD n M SD n*

Depressive symptoms

Entrée 14.04 4.23 265 12.55 4.86 86

Sampler 13.74 4.40 257 11.45 4.75 114

Control 14.17 4.51 133 12.61 5.41 73

Cognitive coping skill usage

Entrée 33.24 6.33 261 33.47 6.45 85

Sampler 32.68 7.58 250 33.94 7.55 113

Control 32.50 7.48 131 32.70 7.42 72

Behavioral coping skill usage

Entrée 32.42 6.21 258 34.00 6.87 85

Sampler 31.91 8.35 252 33.15 8.20 112

Control 31.31 8.16 129 32.14 8.15 72

Interpersonal coping skill usage

Entrée 31.10 7.55 261 31.99 6.84 85

Sampler 30.50 8.35 252 30.81 8.39 111

Control 30.82 8.60 130 30.67 8.22 73

Quality of coping skills

Entrée 3.66 0.87 124 3.93 0.87 62

Sampler 3.70 0.87 137 4.02 1.01 83

Control 3.70 0.88 88 3.96 1.02 53

Loneliness

Entrée 60.93 5.77 258 60.64 5.57 86

Sampler 60.17 7.84 250 59.90 6.71 111

Control 59.99 7.90 129 59.37 7.61 73

*Note.* Depressive symptoms were measured by the Quick Inventory of Depressive Symptoms - Self-report. Cognitive, Behavioral, and Interpersonal coping skill usage was measured using corresponding subscale of the Styles of Emotion Regulation Questionnaire. Quality of coping skills was measured with the quality score from the Ways of Responding Questionnaire. Loneliness was measured by the University of California Los Angeles Loneliness Scale - Version 3.

**Part 3. *Initial Depression Severity as a Moderator of the Impact of Condition (Entrée vs. Sampler vs. Control) on Coping Skill Usage with Confidence Bands Included.***


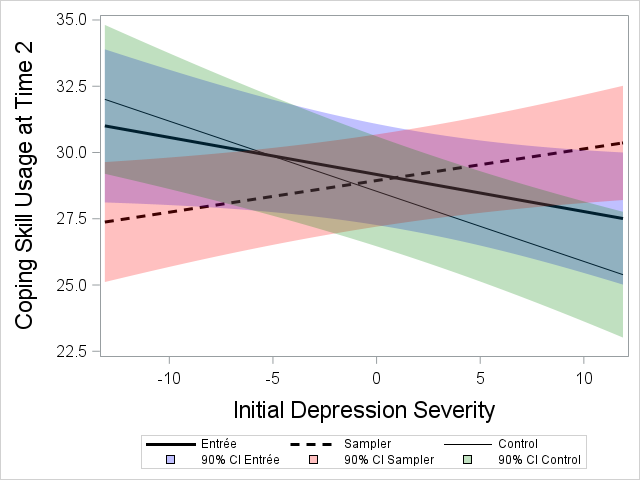


*Note.* Initial depression severity is mean-centered. Coping skill usage at Time 2 was measured using the Styles of Emotion Regulation Questionnaire (SERQ). A repeated-measures regression with an unstructured covariance matrix was used to model the three subscales of interest (Cognitive, Behavioral, and Interpersonal) on the SERQ. Initial depression severity was assessed with the Quick Inventory of Depressive Symptoms - Self-Report.

**Part 4. Coping Skill Preference (Preference for Breadth vs. Depth) as a Moderator of the Impact of Condition (Entrée vs. Sampler) on Coping Skill Usage with Confidence Bands Included.**


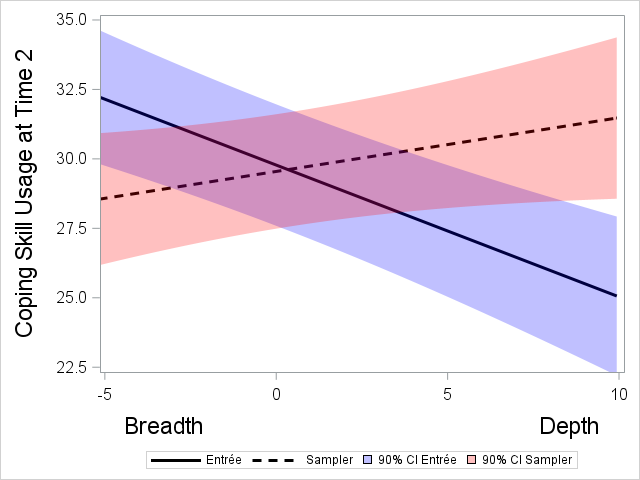


*Note.* Initial depression severity and gender were included as covariates. Coping skill preference is mean-centered. Coping skill usage at Time 2 was measured using the Styles of Emotion Regulation Questionnaire (SERQ). A repeated-measures regression with an unstructured covariance matrix was used to model the three subscales of interest (Cognitive, Behavioral, and Interpersonal) on the SERQ. Coping skill preference was measured using the Breadth Depth Questionnaire (BDQ). The values depicted on the X axis reflect the higher preference for a depth of coping skill vs. a breadth of coping skills.

**Part 5. Breadth/Depth Questionnaire.**

**Directions:**

You will be asked questions about your preferences regarding how you address day-to-day challenges in your life. Please indicate the degree to which you agree/disagree with each statement.

**Response options:**

1: Strongly disagree

2: Disagree

3: Neither agree nor disagree

4: Agree

5: Strongly agree

**Items:**

1. I prefer mastering one coping strategy well, rather than using many different strategies I am less skilled with.
2. When handling an issue, I stick to the coping strategy I know well.
3. The skills I know best can handle a wide variety of problems that could come up.
4. I think the strategies I know best can handle most problems I face.
5. To solve problems, I must be persistent in using my preferred coping strategy.
6. I prefer choosing coping strategies that fit the situation, even if it means using a strategy I do not know well.
7. I tend to explore my options for different ways to cope and choose the best strategy for each problem
8. When addressing challenging situations, I like to consider multiple coping strategies and pick the one I think works best for the situation.
9. Even if it is not the strategy I use most often, I choose the coping strategy that fits the situation best.
10. To solve problems, I must use different strategies that suit each circumstance.

**Part 6. Thought Record** Thought Record

| Directions: When you notice your mood getting worse, ask yourself, “What’s going through my mind right now?” and as soon as possible, jot down the thought or mental image in the Automatic Thoughts column. | | | |
| --- | --- | --- | --- |
| Then consider how accurate or realistic those thoughts are. | | |  |
| **Situation** | **Emotions** | **Automatic Thoughts** | **Alternative Responses** |
| What happened when you get upset? Where were you? | What emotions did you feel at the time? | What thoughts went through your mind? | Read the questions below to write responses to your automatic thoughts. |
|  |  |  |  |

1. What is the evidence that the automatic thought is true? What is the evidence that it is not true?
2. Are there alternative explanations for that event, or alternative ways to view the situation?
3. What are the implications if that thought is true? What’s the most upsetting thing about it? What’s the most realistic view?
4. What would I tell a good friend in the same situation?

**Part 7. Pleasure and Accomplishment Record.**

Pleasure and Accomplishment Record

|  | **Directions** | **Pleasure** | **Accomplishment** |
| --- | --- | --- | --- |
| **Activity** | What activities would you like to complete? When would you like to complete them? |  |  |
| **Process** | What steps are necessary to completing the activities? What can you do to increase your chances of completing this activity? |  |  |
| Examples of accomplishment-related events: Work on a project, clean, exercise, practice an instrument, make something | | | |
| Examples of pleasure-related events: Take a walk, listen to music, read a book, call a friend, play a game | | | |

**Part 8. Communication Record**

Communication Record

| Directions: When you have a situation you’d like to communicate effectively in, create a response using the four sections below. | | | |
| --- | --- | --- | --- |
| **Describe** - What is the situation? | **Express** - How do you feel about the situation? | **Assert** - Ask for what you want. | **Reinforce** - What might reinforce the person for responding positively? |
|  |  |  |  |
| Examples of situations to be assertive in: Asking for help, giving feedback, requesting someone change their behavior, apologizing, asking for clarification, and saying no | | | |
